# Supplementary material for: Association of Self-Reported Sleep Characteristics and Hip Fracture: Observational and Mendelian Randomization Studies
Source: MDPI journal article supplement (doi:10.3390/healthcare11070926), 2023-03-23
Supplement: s1 [file s1]

## Supplementary

### Supplementary Figure S1 Scatter plot of the effect of sleep duration on hip fracture in an MR analysis

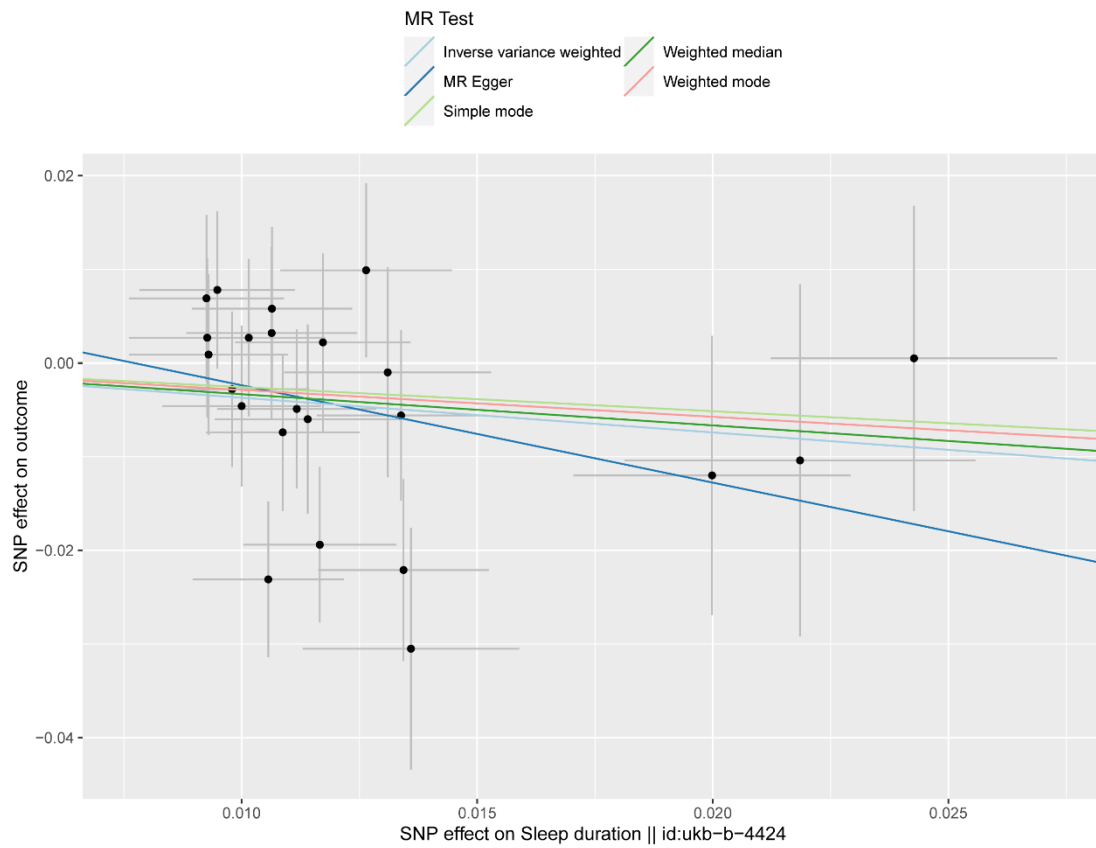

**Supplementary Figure S2** Funnel plot of the effect of sleep duration on hip fracture in an MR analysis

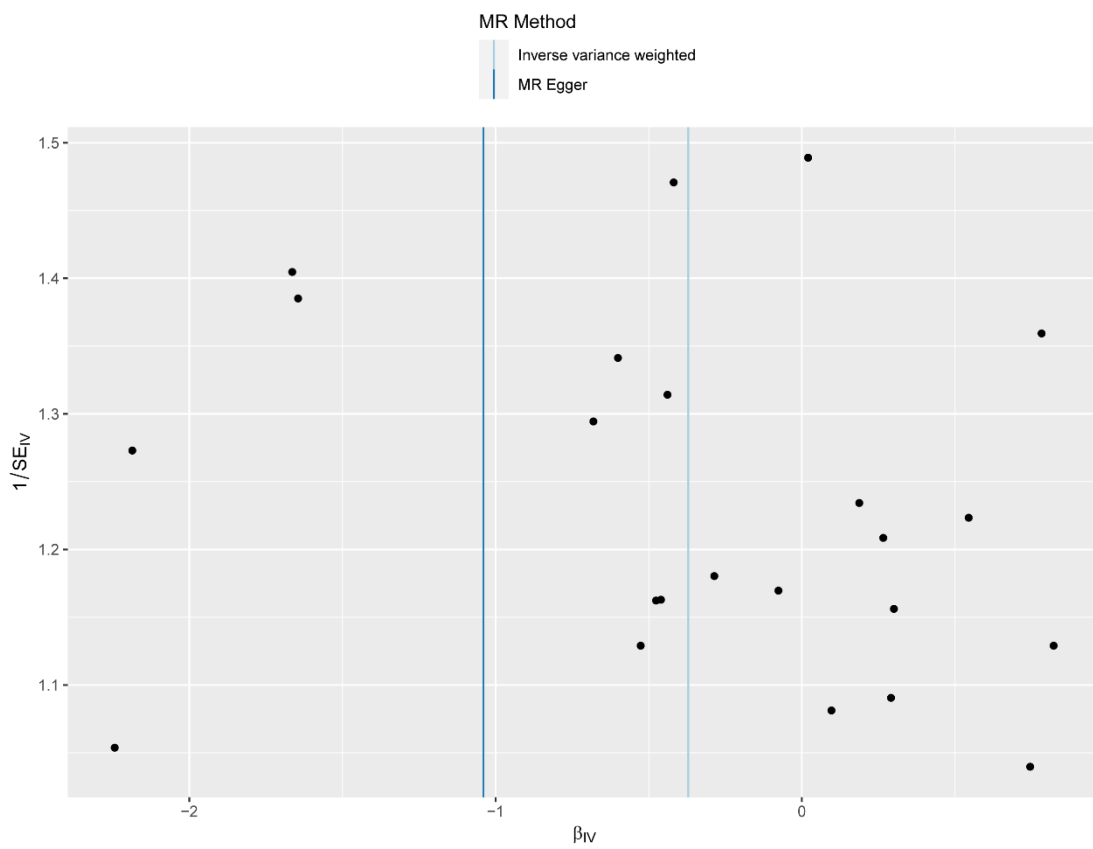

**Supplementary Figure S3** Leave-one-out plot of the effect of sleep duration on hip fracture in an MR analysis

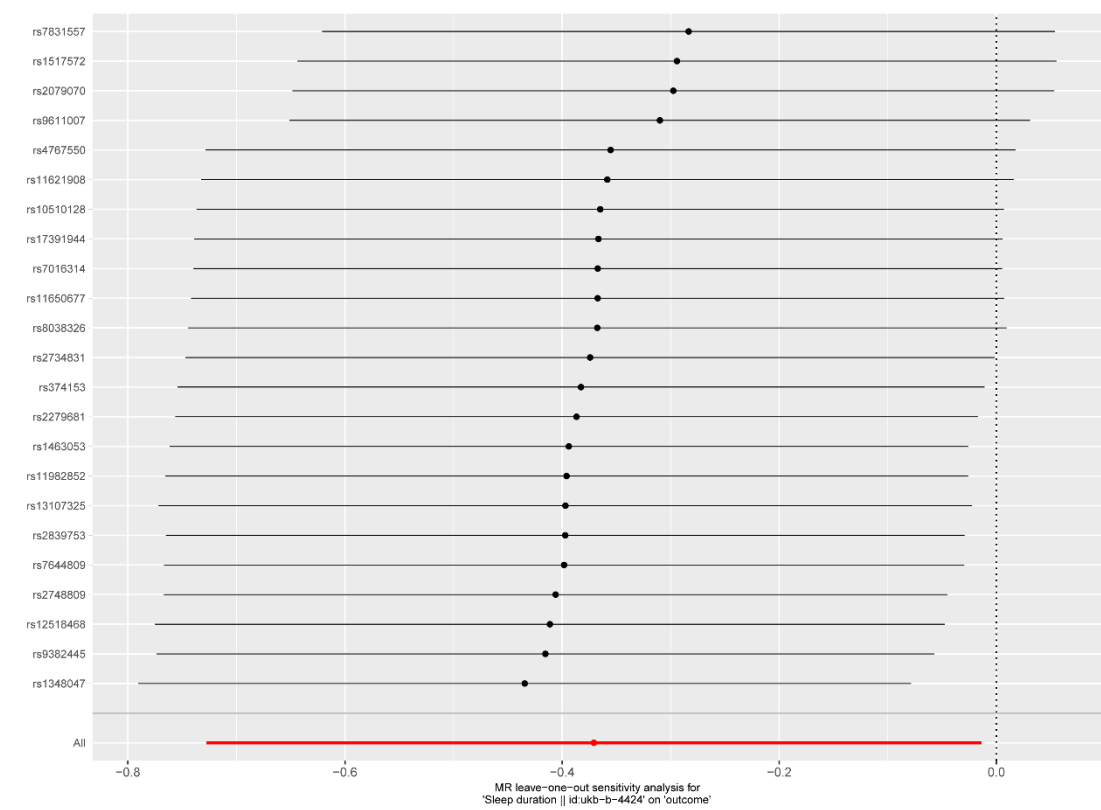

**Supplementary Table S1** SNPs site information for Mendelian randomization analysis was performed

| SNP             | pos.exp<br>osure | chr.exp<br>osure | effect_allele<br>.exposure | other_allele.<br>exposure | se.exp<br>osure | beta.ex<br>posure | pval.ex<br>posure | samplesize.<br>exposure | eaf.exp<br>osure |
|-----------------|------------------|------------------|----------------------------|---------------------------|-----------------|-------------------|-------------------|-------------------------|------------------|
| rs9154<br>16    | 347319<br>84     | 1                | G                          | C                         | 0.0017<br>6     | -<br>0.01273      | 4.80E-<br>13      | 460099                  | 0.7090<br>6      |
| rs2186<br>122   | 664702<br>06     | 1                | T                          | A                         | 0.0016<br>21    | -<br>0.01083      | 2.30E-<br>11      | 460099                  | 0.5599<br>11     |
| rs2279<br>681   | 2.02E+<br>08     | 1                | G                          | C                         | 0.0016<br>85    | 0.00929<br>9      | 3.40E-<br>08      | 460099                  | 0.3417<br>85     |
| rs7517<br>981   | 315550<br>56     | 1                | C                          | T                         | 0.0016<br>34    | -<br>0.00997      | 1.10E-<br>09      | 460099                  | 0.6014<br>98     |
| rs1256<br>7114  | 985279<br>51     | 1                | A                          | G                         | 0.0017<br>94    | 0.01233<br>8      | 6.10E-<br>12      | 460099                  | 0.2763<br>68     |
| rs1463<br>053   | 870503<br>7      | 1                | A                          | G                         | 0.0016<br>61    | 0.00927           | 2.40E-<br>08      | 460099                  | 0.6396<br>94     |
| rs6681<br>755   | 717039<br>70     | 1                | A                          | G                         | 0.0020<br>05    | 0.01152<br>7      | 9.00E-<br>09      | 460099                  | 0.1997<br>83     |
| rs3741<br>53    | 403827<br>12     | 2                | T                          | C                         | 0.0021<br>97    | -0.0131           | 2.50E-<br>09      | 460099                  | 0.8425<br>67     |
| rs2863<br>957   | 1.14E+<br>08     | 2                | A                          | C                         | 0.0019<br>29    | 0.02890<br>4      | 9.60E-<br>51      | 460099                  | 0.2205<br>37     |
| rs1972<br>712   | 1.67E+<br>08     | 2                | C                          | T                         | 0.0018<br>48    | 0.01179<br>6      | 1.70E-<br>10      | 460099                  | 0.2494<br>55     |
| rs7283<br>1782  | 1.04E+<br>08     | 2                | A                          | T                         | 0.0018<br>44    | -<br>0.01018      | 3.40E-<br>08      | 460099                  | 0.2694<br>09     |
| rs2683<br>630   | 580580<br>69     | 2                | G                          | C                         | 0.0016<br>56    | 0.01495<br>1      | 1.70E-<br>19      | 460099                  | 0.6290<br>76     |
| rs7553<br>9574  | 588716<br>58     | 2                | C                          | A                         | 0.0028<br>74    | 0.02366<br>5      | 1.80E-<br>16      | 460099                  | 0.0857<br>74     |
| rs3566<br>2245  | 1.48E+<br>08     | 2                | A                          | T                         | 0.0016<br>91    | 0.01015<br>7      | 1.90E-<br>09      | 460099                  | 0.3387<br>13     |
| rs6783<br>516   | 1.79E+<br>08     | 3                | T                          | G                         | 0.0016<br>31    | -<br>0.00984      | 1.60E-<br>09      | 460099                  | 0.5838<br>17     |
| rs7625<br>8078  | 558238<br>90     | 3                | G                          | A                         | 0.0036<br>81    | -<br>0.02169      | 3.80E-<br>09      | 460099                  | 0.0499<br>94     |
| rs1130<br>21516 | 1.36E+<br>08     | 3                | C                          | G                         | 0.0016<br>97    | 0.01148<br>1      | 1.30E-<br>11      | 460099                  | 0.3358<br>98     |
| rs1773<br>2997  | 704708<br>34     | 3                | G                          | C                         | 0.0016<br>18    | -<br>0.00884      | 4.60E-<br>08      | 460099                  | 0.4296<br>79     |
| rs9810<br>474   | 749611<br>96     | 3                | T                          | C                         | 0.0018<br>94    | -<br>0.01115      | 3.90E-<br>09      | 460099                  | 0.2321<br>84     |

|                 |              |    |   |   |              |              |              |        |              |
|-----------------|--------------|----|---|---|--------------|--------------|--------------|--------|--------------|
| rs7644<br>809   | 1.08E+<br>08 | 3  | C | T | 0.0016<br>25 | -<br>0.01015 | 4.10E-<br>10 | 460099 | 0.5760<br>33 |
| rs1310<br>7325  | 1.03E+<br>08 | 4  | T | C | 0.0030<br>39 | -<br>0.02427 | 1.40E-<br>15 | 460099 | 0.0749<br>05 |
| rs2192<br>528   | 183278<br>96 | 4  | G | A | 0.0016<br>01 | -<br>0.00981 | 9.10E-<br>10 | 460099 | 0.5224<br>93 |
| rs2839<br>753   | 822872<br>50 | 4  | C | T | 0.0018<br>12 | -<br>0.01064 | 4.40E-<br>09 | 460099 | 0.2653<br>47 |
| rs7711<br>696   | 1.35E+<br>08 | 5  | T | G | 0.0017<br>35 | -<br>0.00987 | 1.30E-<br>08 | 460099 | 0.3049<br>87 |
| rs1251<br>8468  | 724969<br>6  | 5  | C | T | 0.0017<br>03 | -<br>0.01064 | 4.10E-<br>10 | 460099 | 0.3286<br>85 |
| rs3656<br>63    | 142888<br>3  | 5  | G | A | 0.0016<br>1  | -<br>0.00928 | 8.10E-<br>09 | 460099 | 0.4549<br>5  |
| rs6889<br>592   | 1.02E+<br>08 | 5  | A | G | 0.0016<br>97 | 0.01176<br>6 | 4.10E-<br>12 | 460099 | 0.3326<br>08 |
| rs1510<br>14368 | 1.77E+<br>08 | 5  | A | G | 0.0019<br>88 | 0.01137<br>9 | 1.00E-<br>08 | 460099 | 0.2073<br>4  |
| rs9382<br>445   | 549379<br>74 | 6  | C | T | 0.0016<br>49 | -<br>0.00948 | 8.90E-<br>09 | 460099 | 0.3751<br>68 |
| rs1131<br>13059 | 431603<br>75 | 6  | C | T | 0.0019<br>33 | -<br>0.01113 | 8.60E-<br>09 | 460099 | 0.2198<br>34 |
| rs7740<br>402   | 1.31E+<br>08 | 6  | G | T | 0.0017<br>35 | -<br>0.00951 | 4.10E-<br>08 | 460099 | 0.3061       |
| rs9345<br>234   | 931626<br>39 | 6  | C | A | 0.0016<br>24 | 0.00919<br>2 | 1.50E-<br>08 | 460099 | 0.5778<br>6  |
| rs3455<br>6183  | 285847<br>75 | 6  | G | A | 0.0017<br>82 | -<br>0.01335 | 6.60E-<br>14 | 460099 | 0.2798<br>88 |
| rs1198<br>2852  | 1.33E+<br>08 | 7  | T | C | 0.0018<br>62 | -<br>0.01173 | 3.10E-<br>10 | 460099 | 0.2438<br>58 |
| rs6244<br>4917  | 210726<br>2  | 7  | C | A | 0.0019<br>26 | 0.01296<br>3 | 1.70E-<br>11 | 460099 | 0.2223<br>15 |
| rs2079<br>070   | 1.14E+<br>08 | 7  | G | C | 0.0018<br>11 | -<br>0.01344 | 1.20E-<br>13 | 460099 | 0.7345<br>82 |
| rs7831<br>557   | 102802<br>28 | 8  | A | G | 0.0016<br>01 | -<br>0.01057 | 4.20E-<br>11 | 460099 | 0.5174<br>38 |
| rs7016<br>314   | 140436<br>62 | 8  | C | T | 0.0016<br>88 | 0.01000<br>1 | 3.10E-<br>09 | 460099 | 0.6559<br>27 |
| rs1739<br>1944  | 369014<br>94 | 9  | G | T | 0.0037<br>24 | 0.02185<br>2 | 4.40E-<br>09 | 460099 | 0.0498<br>6  |
| rs1121<br>00783 | 705411<br>93 | 10 | A | G | 0.0045<br>49 | -<br>0.02529 | 2.70E-<br>08 | 460099 | 0.0334<br>39 |
| rs1051<br>0128  | 1.25E+<br>08 | 10 | A | G | 0.0019<br>74 | 0.01140<br>3 | 7.70E-<br>09 | 460099 | 0.2079<br>51 |

|                |              |    |   |   |              |              |              |        |              |
|----------------|--------------|----|---|---|--------------|--------------|--------------|--------|--------------|
| rs2236<br>295  | 645648<br>92 | 10 | T | G | 0.0016<br>36 | -<br>0.00908 | 2.90E-<br>08 | 460099 | 0.4030<br>43 |
| rs1517<br>572  | 288298<br>82 | 11 | C | A | 0.0016<br>22 | 0.01165<br>9 | 6.50E-<br>13 | 460099 | 0.5812<br>56 |
| rs7115<br>856  | 437692<br>87 | 11 | C | A | 0.0016<br>03 | 0.01081<br>9 | 1.50E-<br>11 | 460099 | 0.4612<br>73 |
| rs1103<br>9216 | 474065<br>92 | 11 | T | C | 0.0016<br>04 | -<br>0.01028 | 1.50E-<br>10 | 460099 | 0.5329<br>44 |
| rs2734<br>831  | 1.13E+<br>08 | 11 | G | T | 0.0016<br>39 | -0.0098      | 2.20E-<br>09 | 460099 | 0.6068<br>81 |
| rs1745<br>64   | 615883<br>05 | 11 | G | A | 0.0016<br>78 | 0.00974<br>5 | 6.30E-<br>09 | 460099 | 0.3486<br>02 |
| rs1939<br>455  | 1.02E+<br>08 | 11 | T | G | 0.0025<br>17 | -0.0158      | 3.50E-<br>10 | 460099 | 0.1202<br>91 |
| rs1553<br>132  | 882977<br>40 | 11 | G | A | 0.0018<br>25 | 0.01052<br>6 | 8.10E-<br>09 | 460099 | 0.2586<br>38 |
| rs3435<br>4917 | 387645<br>59 | 12 | A | C | 0.0017<br>68 | -<br>0.01002 | 1.40E-<br>08 | 460099 | 0.2886<br>25 |
| rs4767<br>550  | 1.18E+<br>08 | 12 | G | A | 0.0016<br>33 | 0.01087<br>3 | 2.70E-<br>11 | 460099 | 0.4131<br>71 |
| rs6561<br>715  | 538885<br>26 | 13 | A | T | 0.0016<br>61 | 0.00978<br>2 | 3.90E-<br>09 | 460099 | 0.6306<br>36 |
| rs5565<br>8675 | 655546<br>38 | 14 | T | C | 0.0016<br>75 | -<br>0.00969 | 7.10E-<br>09 | 460099 | 0.3529<br>06 |
| rs1162<br>1908 | 784957<br>61 | 14 | T | C | 0.0029<br>43 | -<br>0.01999 | 1.10E-<br>11 | 460099 | 0.0828<br>07 |
| rs2748<br>809  | 997352<br>33 | 14 | C | T | 0.0016<br>45 | -<br>0.00925 | 1.90E-<br>08 | 460099 | 0.4292<br>58 |
| rs8038<br>326  | 479897<br>99 | 15 | G | A | 0.0017<br>93 | -<br>0.01338 | 8.40E-<br>14 | 460099 | 0.2731<br>69 |
| rs5636<br>7859 | 654079<br>5  | 16 | G | A | 0.0016<br>36 | 0.01162<br>2 | 1.20E-<br>12 | 460099 | 0.3975<br>85 |
| rs9302<br>680  | 562698<br>92 | 16 | A | G | 0.0016<br>11 | 0.01204<br>4 | 7.60E-<br>14 | 460099 | 0.4392<br>72 |
| rs1164<br>3715 | 239095<br>38 | 16 | G | C | 0.0017<br>6  | 0.01094<br>9 | 5.00E-<br>10 | 460099 | 0.2926<br>25 |
| rs8047<br>587  | 537986<br>22 | 16 | T | G | 0.0016<br>13 | -<br>0.01102 | 8.30E-<br>12 | 460099 | 0.4395<br>14 |
| rs7277<br>1082 | 200236<br>01 | 16 | G | A | 0.0019<br>36 | 0.01097<br>4 | 1.40E-<br>08 | 460099 | 0.2178<br>32 |
| rs8074<br>498  | 799545<br>44 | 17 | A | T | 0.0016<br>34 | -<br>0.00933 | 1.10E-<br>08 | 460099 | 0.5809<br>51 |
| rs1165<br>0677 | 112315<br>13 | 17 | A | G | 0.0016<br>9  | 0.01117      | 3.80E-<br>11 | 460099 | 0.3391<br>85 |

|                |              |    |   |   |              |              |              |        |              |
|----------------|--------------|----|---|---|--------------|--------------|--------------|--------|--------------|
| rs9903<br>898  | 455753<br>54 | 17 | T | C | 0.0016<br>01 | -<br>0.00945 | 3.60E-<br>09 | 460099 | 0.4888<br>83 |
| rs8072<br>993  | 213356<br>27 | 17 | G | T | 0.0019<br>92 | 0.01092<br>2 | 4.20E-<br>08 | 460099 | 0.6356<br>77 |
| rs1348<br>047  | 530500<br>58 | 18 | T | G | 0.0018<br>2  | -<br>0.01264 | 3.80E-<br>12 | 460099 | 0.2672<br>53 |
| rs3512<br>6035 | 349867<br>67 | 19 | C | A | 0.0016<br>44 | -0.0092      | 2.20E-<br>08 | 460099 | 0.5583<br>3  |
| rs3478<br>6000 | 994212<br>3  | 19 | T | G | 0.0016<br>28 | 0.01095<br>8 | 1.70E-<br>11 | 460099 | 0.5533<br>61 |
| rs2072<br>727  | 435387<br>33 | 20 | C | T | 0.0016<br>14 | -<br>0.00927 | 9.30E-<br>09 | 460099 | 0.5645<br>9  |
| rs9611<br>007  | 390770<br>58 | 22 | T | C | 0.0022<br>97 | -<br>0.01359 | 3.30E-<br>09 | 460099 | 0.1416<br>73 |
